# Supplementary material for: Brain Network Organization in Focal Epilepsy: A Systematic Review and Meta-Analysis
Source: PubMed Central journal article supplement (PMC4262431; doi:10.1371/journal.pone.0114606), 2014-12-10
Supplement: pone.0114606.s002.pdf [file pone.0114606.s002.pdf]

## Supporting Information

|                                                                                                                                                                                                                                                                                                                                                                                                                                                                                                                                                                                                                                                                                                                                                                                                                                                                                                                                                          |
|----------------------------------------------------------------------------------------------------------------------------------------------------------------------------------------------------------------------------------------------------------------------------------------------------------------------------------------------------------------------------------------------------------------------------------------------------------------------------------------------------------------------------------------------------------------------------------------------------------------------------------------------------------------------------------------------------------------------------------------------------------------------------------------------------------------------------------------------------------------------------------------------------------------------------------------------------------|
| <b>Pubmed (NCBI) Search</b>                                                                                                                                                                                                                                                                                                                                                                                                                                                                                                                                                                                                                                                                                                                                                                                                                                                                                                                              |
| ((TS=(epilepsy OR seizure OR convulsion) AND TS=(DTI OR "diffusion tensor imaging" OR "diffusion magnetic resonance imaging" OR "diffusion weighted imaging" OR EEG OR electroencephalogram OR MEG OR magnetoencephalogram OR fMRI OR "functional MRI" OR "functional magnetic resonance imaging" OR sMRI OR "structural MRI" OR "structural magnetic resonance imaging" OR "cortical thickness") AND TS=(Network OR "network analysis" OR "network theoretical analysis" OR "network-theoretical analysis" OR "graph analysis" OR "graph theoretical analysis" OR "graph-theoretical analysis" OR "clustering coefficient" OR "path length" OR "shortest path" OR "small-world index" OR "small world index" OR "small-worldness" OR "small worldness" OR "local efficiency" OR "global efficiency" OR segregation OR integration OR topology))) AND Language=(English)                                                                                 |
| <i>Databases=SCI-EXPANDED, CPCI-S Timespan=All Years</i>                                                                                                                                                                                                                                                                                                                                                                                                                                                                                                                                                                                                                                                                                                                                                                                                                                                                                                 |
| <b>ISI Web of Science (Thomson Reuters) search</b>                                                                                                                                                                                                                                                                                                                                                                                                                                                                                                                                                                                                                                                                                                                                                                                                                                                                                                       |
| ((TS=(epilepsy OR seizure OR convulsion) AND TS=(DTI OR "diffusion tensor imaging" OR "diffusion magnetic resonance imaging" OR "diffusion weighted imaging" OR EEG OR electroencephalogram OR MEG OR magnetoencephalogram OR fMRI OR "functional MRI" OR "functional magnetic resonance imaging" OR sMRI OR "structural MRI" OR "structural magnetic resonance imaging" OR "cortical thickness") AND TS=(Network OR "network analysis" OR "network theoretical analysis" OR "network-theoretical analysis" OR "graph analysis" OR "graph theoretical analysis" OR "graph-theoretical analysis" OR "clustering coefficient" OR "path length" OR "shortest path" OR "small-world index" OR "small world index" OR "small-worldness" OR "small worldness" OR "local efficiency" OR "global efficiency" OR segregation OR integration OR topology))) AND Language=(English)<br>Refined by: Web of Science Categories=( CLINICAL NEUROLOGY OR NEUROIMAGING ) |
| <i>Timespan=All Years. Databases=SCI-EXPANDED, CPCI-S</i>                                                                                                                                                                                                                                                                                                                                                                                                                                                                                                                                                                                                                                                                                                                                                                                                                                                                                                |
| <b>Embase (Excerpta Medica Database) search</b>                                                                                                                                                                                                                                                                                                                                                                                                                                                                                                                                                                                                                                                                                                                                                                                                                                                                                                          |
| ((TS=(epilepsy OR seizure OR convulsion) AND TS=(DTI OR "diffusion tensor imaging" OR "diffusion magnetic resonance imaging" OR "diffusion weighted imaging" OR EEG OR electroencephalogram OR MEG OR magnetoencephalogram OR fMRI OR "functional MRI" OR "functional magnetic resonance imaging" OR sMRI OR "structural MRI" OR "structural magnetic resonance imaging" OR "cortical thickness") AND TS=(Network OR "network analysis" OR "network theoretical analysis" OR "network-theoretical analysis" OR "graph analysis" OR "graph theoretical analysis" OR "graph-theoretical analysis" OR "clustering coefficient" OR "path length" OR "shortest path" OR "small-world index" OR "small world index" OR "small-worldness" OR "small worldness" OR "local efficiency" OR "global efficiency" OR segregation OR integration OR topology))) AND Language=(English)<br>Refined by: Research Areas=( NEUROSCIENCES NEUROLOGY )                       |
| <i>Databases=SCI-EXPANDED, CPCI-S Timespan=All Years</i>                                                                                                                                                                                                                                                                                                                                                                                                                                                                                                                                                                                                                                                                                                                                                                                                                                                                                                 |

### Table S1. Search strategy

Search strategies for the online databases Pubmed (NCBI), ISI Web of Science (Thomson Reuters) and Embase (Excerpta Medica Database).

| Study                    | Modality | Recording characteristics                      | Condition                                                                         | Reference                                             | Artifact management                                                                                                                                                                                    |
|--------------------------|----------|------------------------------------------------|-----------------------------------------------------------------------------------|-------------------------------------------------------|--------------------------------------------------------------------------------------------------------------------------------------------------------------------------------------------------------|
| Bartolomei et al., 2006  | MEG      | SF: 312.5 Hz<br>Bandpass filter of 0.25-125 Hz | Awake, no-task, EC                                                                | n.a.                                                  | Selection of artifact free epochs by visual analysis                                                                                                                                                   |
| Bosma et al., 2009       | MEG      | SF: 312.5 Hz<br>Bandpass filter of 0.25-125 Hz | Awake, no-task, EC                                                                | n.a.                                                  | Selection of artifact free epochs by visual analysis                                                                                                                                                   |
| Horstmann et al., 2010   | EEG      | SF: 254.31 Hz<br>Bandpass filter of 0-50 Hz    | Awake, no-task, 15 min EO, 15 min EC<br>Acoustical instruction to open/close eyes | Right mastoid and average common reference            | EOG to record ocular artifacts<br>Wavelet-based correction scheme to minimize influence of technical (e.g., amplifier resets) and physiologic artifacts (e.g., eye movements/blinks or head movements) |
| Liao et al., 2010        | fMRI     | FS: 1.5 T<br>Echoplanar imaging sequence       | Awake, no-task, EC                                                                | T1-weighted image for anatomic reference              | First 10 images discarded to ensure magnetization equilibrium<br>Other images: acquisition time-delay and head motion correction, translation or rotation > +1 mm or +10° = excluded                   |
| Quraan et al., 2013      | EEG      | SF: 500 Hz<br>Bandpass filter of 2-20 Hz       | Awake, no-task, 3 min EO, 3 min EC                                                | Average common reference                              | EOG to record ocular artifacts<br>Manual removal remaining artifacts                                                                                                                                   |
| Vaessen et al., 2013     | fMRI     | FS: 3.0 T<br>Echoplanar imaging sequence       | n.r.                                                                              | T1-weighted 3D fast field echo for anatomic reference | Correction for motion artifacts and high frequency noise                                                                                                                                               |
| Van Dellen et al., 2012  | MEG      | SF: 625 Hz<br>Bandpass filter of 0.25-125 Hz   | Awake, no-task, EC                                                                | n.a.                                                  | Selection of artifact free epochs by visual analysis                                                                                                                                                   |
| Van Diessen et al., 2013 | EEG      | SF: 512 Hz<br>Bandpass filter of 0.16-70 Hz    | Awake, no-task, EC                                                                | Average reference                                     | Removal of Fp1, Fp2, A1, and A2 electrodes to minimize eye-movement artifacts<br>Selection of artifact free epochs by visual analysis                                                                  |
| Vlooswijk et al., 2011   | fMRI     | FS: 3.0 T<br>Echoplanar imaging sequence       | Awake, 6 times 30s word-paradigm, 6 times 30s no-task resting state               | T1-weighted 3D fast field echo for anatomic reference | Acquisition time-delay and head motion correction                                                                                                                                                      |

**Table S2. Additional methodological information on the encephalographic and functional MRI studies**

SF = sample frequency, FS = field strength, Hz = hertz, T = tesla, EC = eyes closed, EO = eyes open, EOG = electrooculography, n.a. = not applicable, n.r. = not reported, Fp = frontopolar, A = auricular.

## Meta-analysis of epileptic brain networks

| Study                    | Quality indicators from the Newcastle-Ottawa Scale [67] |   |               |   |    |          |             | Total score |
|--------------------------|---------------------------------------------------------|---|---------------|---|----|----------|-------------|-------------|
|                          | Selection                                               |   | Comparability |   |    | Exposure | Total score |             |
|                          | 1                                                       | 2 | 3             | 4 | 5A | 5B       |             |             |
| Bartolomei et al., 2006  | *                                                       |   | *             | * |    | *        | *           | 5           |
| Bernhardt et al., 2011   | *                                                       | * | *             | * | *  | *        | *           | 7           |
| Bonilha et al., 2012     | *                                                       | * | *             | * | *  | *        | *           | 7           |
| Bosma et al., 2009       | *                                                       | * | *             | * | *  | *        | *           | 7           |
| Horstmann et al., 2010   | *                                                       | * | *             | * |    | *        | *           | 6           |
| Liao et al., 2010        | *                                                       | * | *             | * |    | *        | *           | 6           |
| Quraan et al., 2013      | *                                                       | * | *             | * |    |          | *           | 5           |
| Raj et al., 2010         | *                                                       | * | *             |   | *  | *        | *           | 6           |
| Vaessen et al., 2012     | *                                                       | * | *             | * |    | *        | *           | 6           |
| Vaessen et al., 2013     | *                                                       | * | *             | * | *  |          | *           | 6           |
| van Dellen et al., 2012  | *                                                       | * | *             | * |    | *        | *           | 6           |
| van Diessen et al., 2013 | *                                                       | * | *             | * | *  | *        | *           | 7           |
| Vlooswijk et al., 2011   | *                                                       | * | *             | * |    |          | *           | 5           |

**Table S3. Study quality assessment.**

The table presents the Newcastle-Ottawa Scale quality assessment categories. These categories are included: 1 = cases independently validated; 2 = cases are representative of the population; 3 = community controls; 4 = controls have no history of focal epilepsy; 5A = study controls for age; 5B = study controls for additional factors; 6 = ascertainment of exposure by blinded interview or secure record.

|                                           | Average path length |         |                   |         | Average clustering coefficient |          |                   |         |
|-------------------------------------------|---------------------|---------|-------------------|---------|--------------------------------|----------|-------------------|---------|
|                                           | I <sup>2</sup> (%)  | p-value | SMD (CI)          | p-value | I <sup>2</sup> (%)             | p-value  | SMD (CI)          | p-value |
| None<br>(= weighted; high sparsity level) | 0                   | 0.57    | 0.29 (0.12, 0.45) | 0.0007  | 73                             | <0.0001  | 0.35 (0.05, 0.65) | 0.02    |
| -----                                     |                     |         |                   |         |                                |          |                   |         |
| Network direction:                        |                     |         |                   |         |                                |          |                   |         |
| Binary instead of weighted <sup>i</sup>   | 8                   | 0.37    | 0.22 (0.05, 0.38) | 0.009   | 75                             | <0.00001 | 0.32 (0.00, 0.63) | 0.05    |
| Sparsity level <sup>ii</sup> :            |                     |         |                   |         |                                |          |                   |         |
| Low                                       | 0                   | 0.60    | 0.24 (0.08, 0.40) | 0.003   | 72                             | <0.0001  | 0.36 (0.06, 0.65) | 0.02    |
| Middle                                    | 0                   | 0.65    | 0.23 (0.08, 0.39) | 0.003   | 73                             | <0.0001  | 0.34 (0.03, 0.64) | 0.03    |

**Table S4. Sensitivity analysis**

The robustness of the summary estimates is presented as recalculations of the summary estimates at different network sparsity levels and for binary or weighted networks. <sup>i</sup> In the analysis of network directionality, we used the binary instead of weighted data from the average clustering coefficient and average path length provided by [30] and [42]; <sup>ii</sup> In the sparsity level analyses we used data from low and middle instead of high sparsity levels provided by [21], [39], and [42]. SMD = standardized mean difference, CI = 95 % confidence interval.

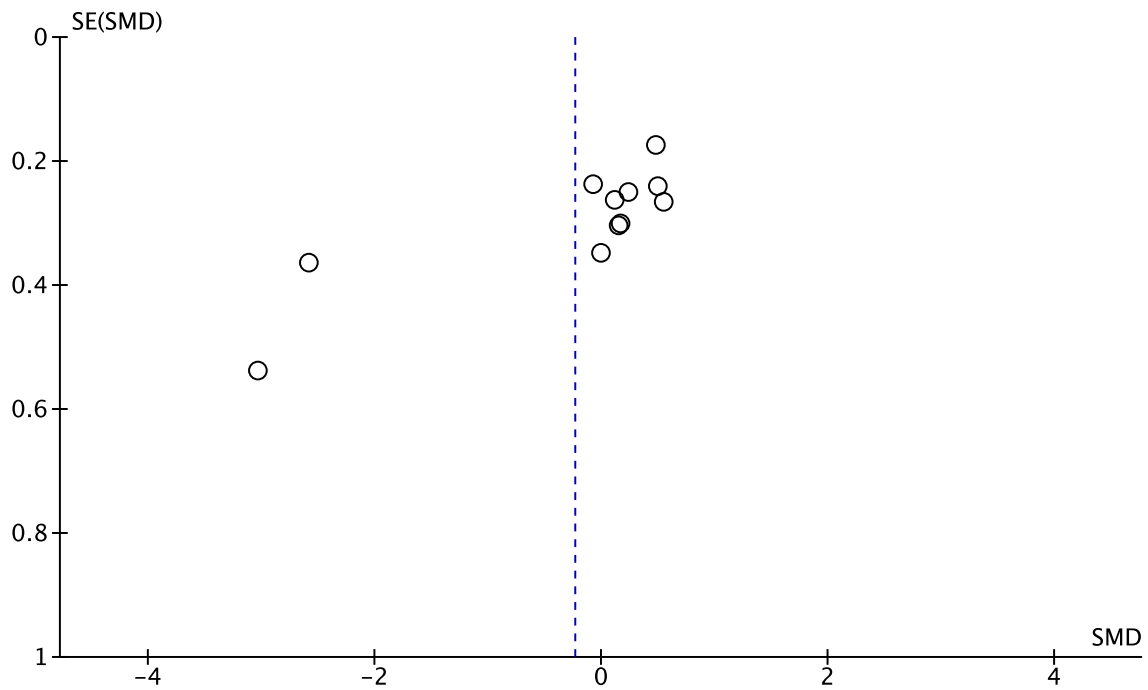

**Figure S1. Funnel plot of average path length for individual studies**

A funnel plot for the standardized mean difference (SMD) average path length estimates from individual studies against the standard error (SE) of the SMD as a measure of the study's precision. The dashed vertical line corresponds to the overall summary SMD estimate.

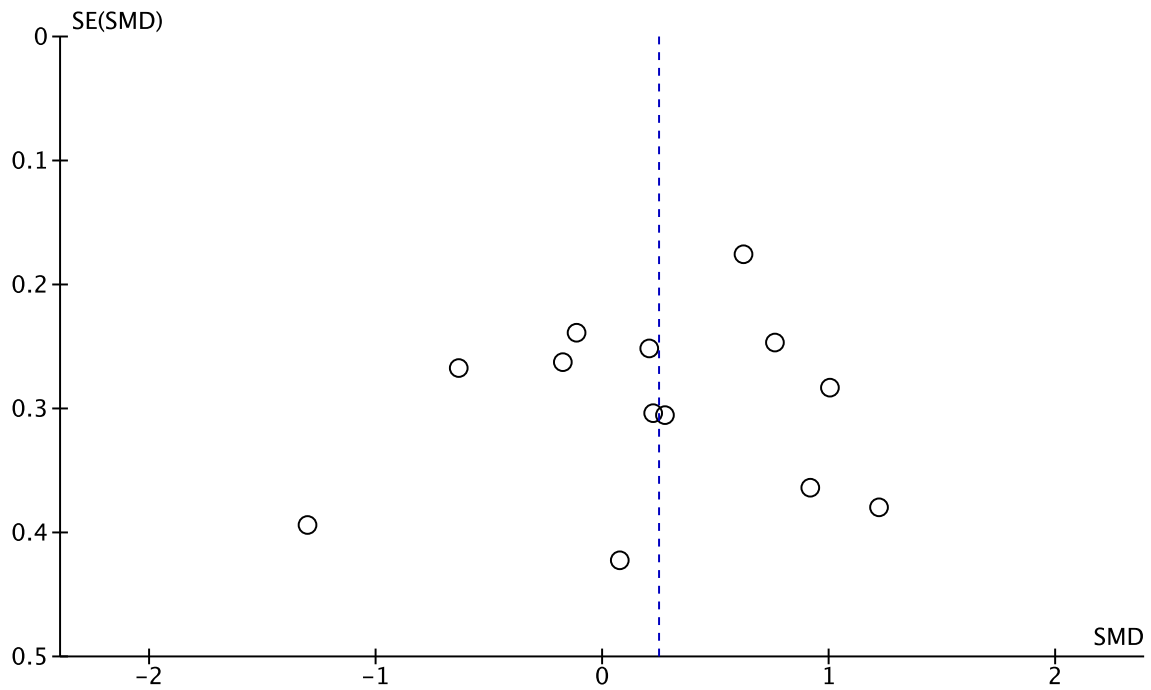

**Figure S2. Funnel plot of average clustering coefficient for individual studies**

A funnel plot for the standardized mean difference (SMD) average clustering coefficient estimates from individual studies against the standard error (SE) of the SMD as a measure of the study's precision. The dashed vertical line corresponds to the overall summary SMD estimate.

## Meta-analysis of epileptic brain networks

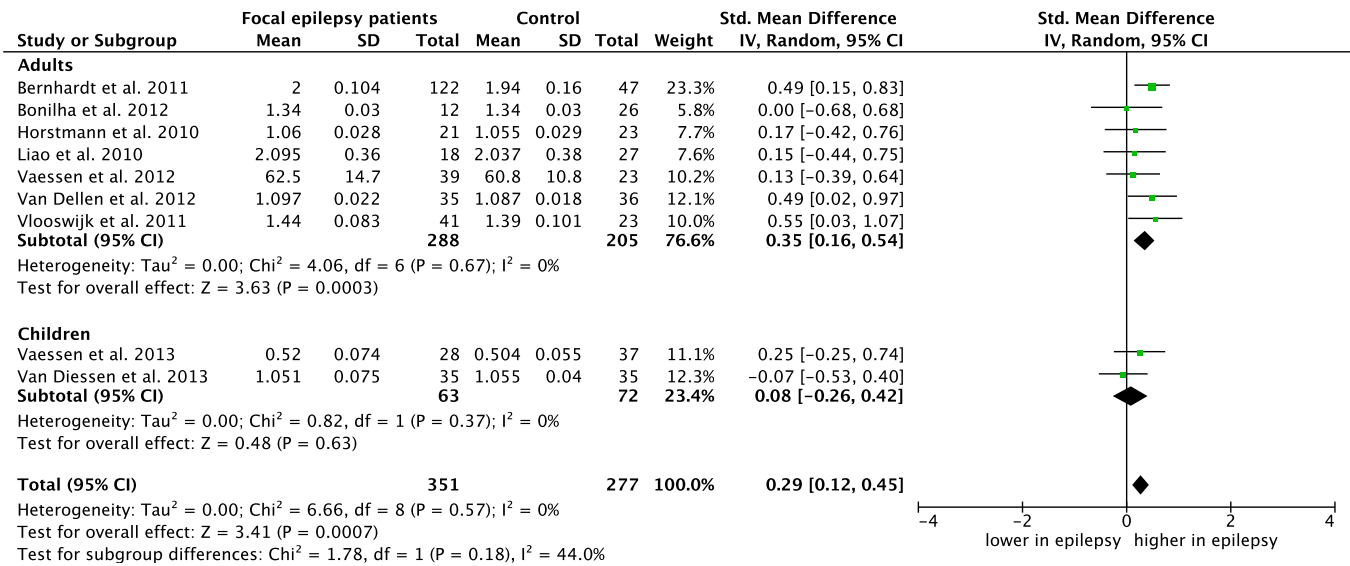

**Figure S3a. Meta-analysis of the average path length according to age**

The forest plot displays the standardized mean differences (SMD) between focal epilepsy patients and controls with the 95% confidence intervals (CI) for the network studies reporting the average path length. Studies are divided in two categories: studies on children and studies on adults. No difference between patients and controls is specified with a vertical line at 0. The overall pooled SMD for the average path length of adults was 0.35 (CI: 0.16 to 0.54,  $p = 0.0003$ ) and 0.08 (CI: -0.26 to 0.42,  $p = 0.63$ ) for the path length of children. The SMDs of these subgroups were not statistically different ( $p = 0.18$ ,  $I^2 = 44.0\%$ ).

## Meta-analysis of epileptic brain networks

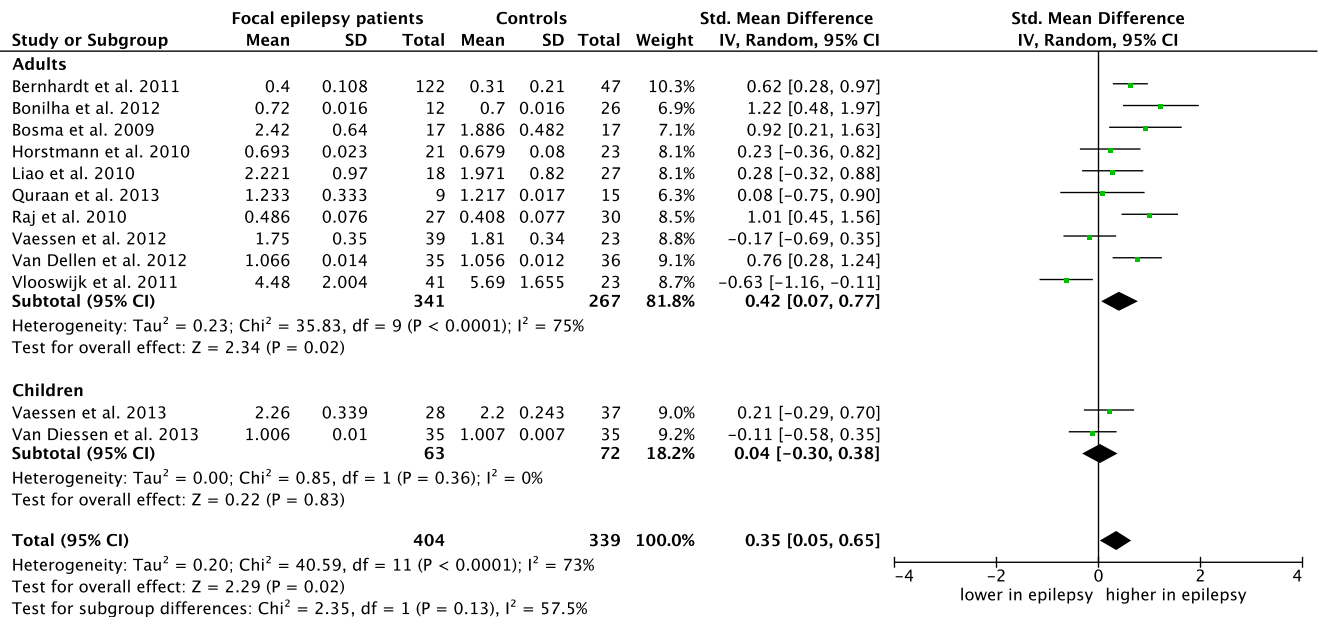

**Figure S3b. Meta-analysis of the average clustering coefficient according to age**

The forest plot displays the standardized mean differences (SMD) between focal epilepsy patients and controls with the 95% confidence intervals (CI) for network studies reporting the average clustering coefficient. Studies are divided in two categories: studies on children and studies on adults. No difference between patients and controls is specified with a vertical line at 0. The overall pooled SMD for the clustering coefficient of adults was 0.42 (CI: 0.07 to 0.77,  $p < 0.0001$ ) and 0.04 (CI: -0.30 to 0.38,  $p = 0.83$ ) for the average path length of children. The SMDs of these subgroups were not statistically different ( $p = 0.13$ ,  $I^2 = 57.5\%$ ).



## Meta-analysis of epileptic brain networks

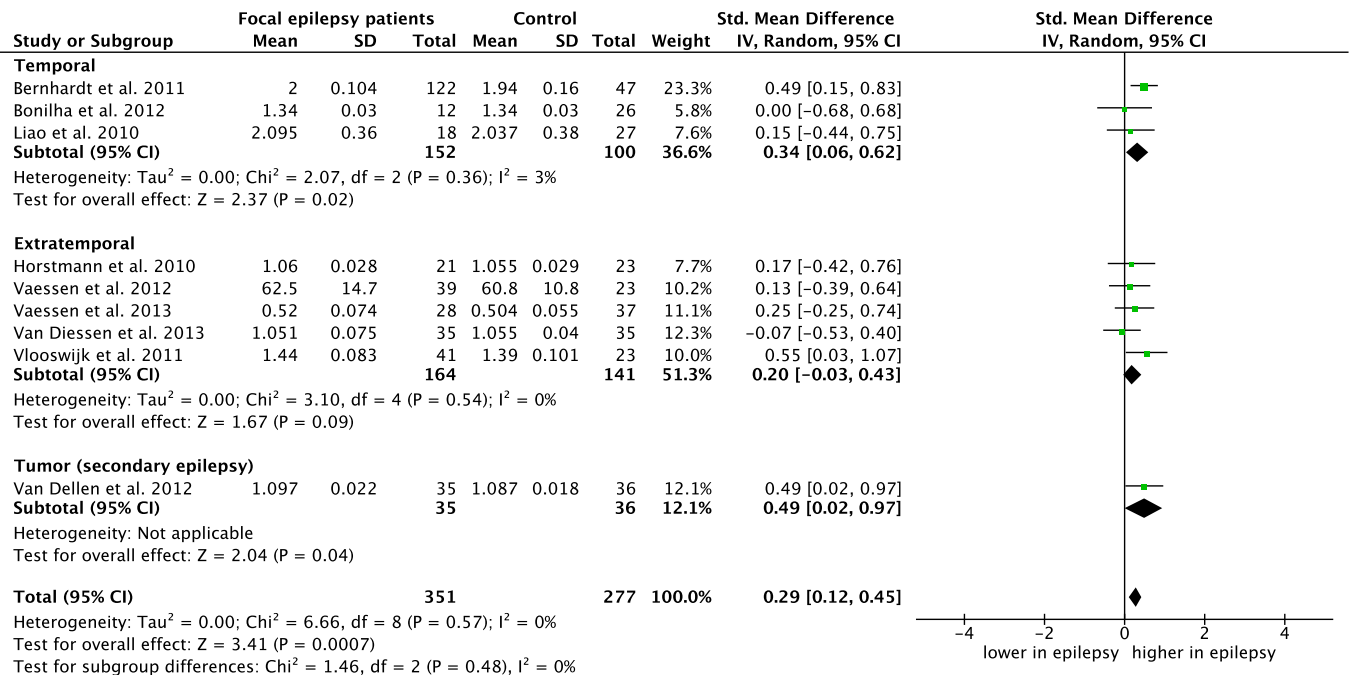

**Figure S4a. Meta-analysis of the average path length according to type of epilepsy**

The forest plot displays the standardized mean differences (SMD) between focal epilepsy patients and controls with the 95% confidence intervals (CI) for the network studies reporting the average path length. Results are separated for studies that included only temporal lobe epilepsy patients, extratemporal or tumor related epilepsy. No difference between patients and controls is specified with a vertical line at 0. The overall pooled SMD for the average path length of studies that investigated temporal lobe epilepsy was 0.34 (CI: 0.06 to 0.62,  $p = 0.02$ ), 0.20 (CI: -0.03 to 0.43,  $p = 0.09$ ) for extratemporal epilepsy. Only one study was included for tumor related epilepsy. The SMDs of these subgroups were not statistically different ( $p = 0.48$ ,  $I^2 = 0\%$ ).

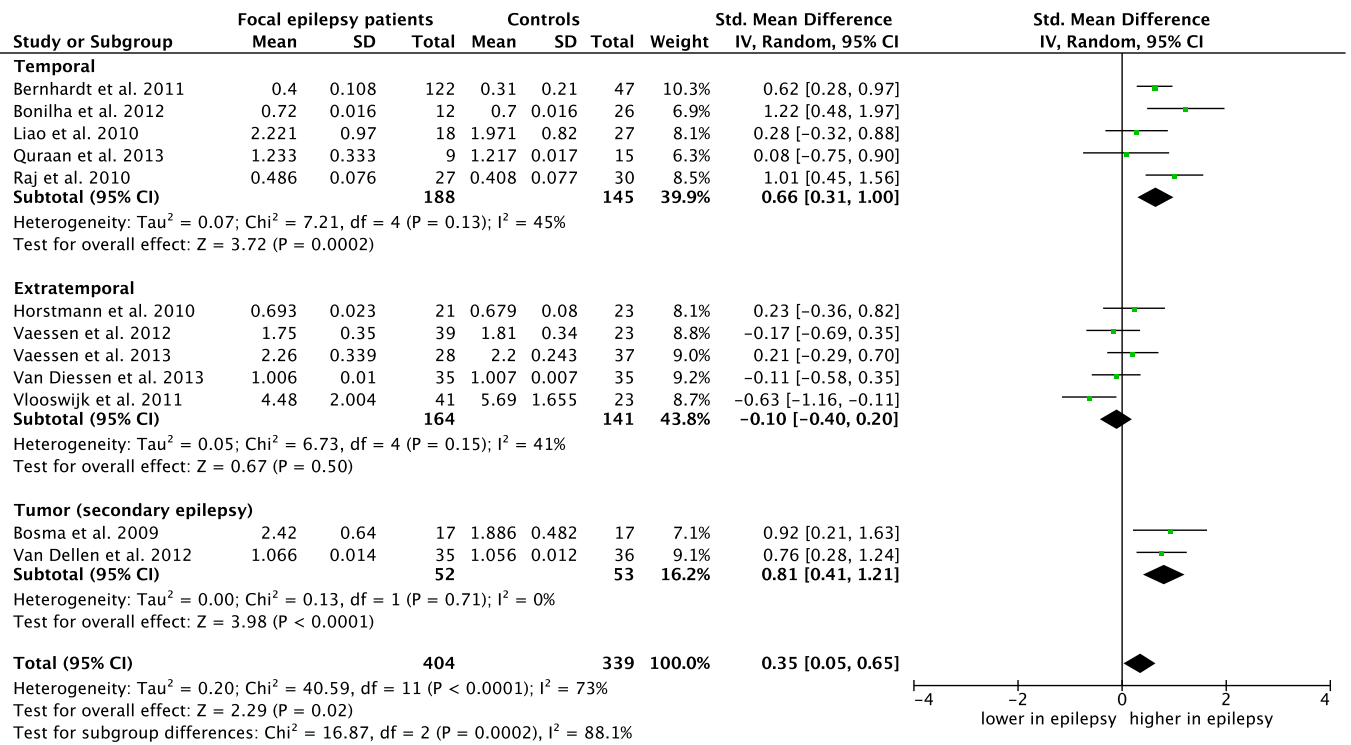

**Figure S4b. Meta-analysis of the average clustering coefficient according to type of epilepsy**

The forest plot displays the standardized mean differences (SMD) between focal epilepsy patients and controls with the 95% confidence intervals (CI) for the network studies reporting the average clustering coefficient. Results are separated for studies that included only temporal lobe epilepsy patients, extratemporal or tumor related epilepsy. No difference between patients and controls is specified with a vertical line at 0. The overall pooled SMD for the average clustering coefficient of studies that investigated temporal lobe epilepsy was 0.66 (CI: 0.31 to 1.00,  $p = 0.0002$ ), -0.10 (CI: -0.40 to 0.20,  $p = 0.50$ ) for extratemporal epilepsy and 0.81 (CI: 0.41 to 1.21,  $p < 0.0001$ ) for tumor related epilepsy. The SMDs of these subgroups were statistically different ( $p = 0.0002$ ), but due to a considerable heterogeneity ( $I^2 = 88.1\%$ ), not reliable.
